1

2 **Full Title:**

3 **Genome wide identification of genes required for bacterial plant infection by Tn-seq**

4

5 **Short title: *Dickeya dadantii* virulence genes in chicory**

6

7 Kevin Royet<sup>1</sup>, Nicolas Parisot<sup>2</sup>, Agnès Rodrigue<sup>1</sup>, Erwan Gueguen<sup>1\*</sup> and Guy Condemine<sup>1</sup>

8

9 1 Univ Lyon, Université Lyon 1, INSA de Lyon, CNRS UMR 5240 Microbiologie

10 Adaptation et Pathogénie, F-69622 Villeurbanne, France.

11 2 Univ Lyon, INSA de Lyon, INRA UMR 203 Biologie Fonctionnelle Insectes et

12 Interactions, F-69621 Villeurbanne, France.

13 \*Corresponding author. [erwan.gueguen@univ-lyon1.fr](mailto:erwan.gueguen@univ-lyon1.fr)

14

15 **Abstract**

16 Soft rot enterobacteria (*Dickeya* and *Pectobacterium*) are major pathogens that provoke  
17 diseases on plants of agricultural importance such as potato and ornamentals. Long term  
18 studies to identify virulence factors of these bacteria focused mostly on plant cell wall  
19 degrading enzymes secreted by the type II Out secretion system and the regulation of their  
20 expression. To identify new virulence factors we performed a Tn-seq genome-wide screen of  
21 a transposon mutant library during chicory infection followed by high-throughput  
22 sequencing. This allowed the detection of mutants with reduced but also increased fitness in  
23 the plant. Virulence factors identified differed from those previously known since diffusible  
24 ones (secreted enzymes, siderophores or metabolites) were not detected by this screen. In  
25 addition to genes encoding proteins of unknown function that could be new virulence factors,  
26 others could be assigned to known biological functions. The central role of the FlhDC  
27 regulatory cascade in the control of virulence was highlighted with the identification of new  
28 members of this pathway. Scarcity of the plant in certain amino acids and nucleic acids  
29 required presence of the corresponding biosynthetic genes in the bacteria. Their products  
30 could be targets for the development of antibacterial compounds. Among the genes required  
31 for full development in chicory we also identified six genes involved in the glycosylation of  
32 the flagellin FliC, a modification which in some other plant pathogenic bacteria contributes to  
33 virulence.

34

35

36

37

38

39

## 40 Introduction

41 *Dickeya* are broad-host range phytopathogenic bacteria belonging to the  
42 Pectobacteriaceae family [1] that provoke the soft rot disease on many plant species. They  
43 are the cause of important losses on economically important crops such as potato, chicory and  
44 ornamentals. Identification and studies on the virulence factors of these bacteria have been  
45 performed mostly on the model strain *D. dadantii* 3937 and focused mainly on three  
46 domains/aspects, known to be important for disease development: plant cell wall degrading  
47 enzymes, the type III secretion system and iron metabolism [2]. Secretion of plant cell wall  
48 degrading enzymes has long ago been identified as the bacteria main virulence factor. Many  
49 studies focused on the identification and characterization of these secreted enzymes, mostly  
50 pectinases [3], of the regulators controlling their production (*kdgR*, *pecS*, *pecT*, *hns*, *gacA*) ,  
51 [4-8] of the genes whose expression is coregulated with that of the secreted enzyme genes [9,  
52 10], and of the mechanism of their secretion by the Out type II secretion system [11].  
53 Although of a lesser importance for *Dickeya* virulence, the same type of approach has been  
54 used to identify Hrp type III secretion system regulators and effectors [12] [13] [14].  
55 Competition for iron within the plant is strong. *D. dadantii* acquires this metal through  
56 production of two siderophores, chrysoactin and achromobactin [15] [16] [17]. More  
57 recently, omics approaches have also been used to identify genes induced during plant  
58 infection [18] [19] [20]. These studies now give a view on a complex network of factors  
59 required for *D. dadantii* virulence [2, 21]. However, these approaches may have missed some  
60 important factors not targeted by these analyses. More global screens need to be performed to  
61 identify these factors. Libraries of transposon-induced mutants were tested on plants to find  
62 mutants showing reduced virulence with *Pectobacterium carotovorum* and *atrosepticum*, two  
63 other soft rot enterobacteria [22, 23]. These studies identified auxotrophs, mutants defective  
64 in production or secretion of exoenzymes and in motility. Other mutants with a more

65 complex phenotype were not characterized at this time. Moreover, the number of tested  
66 mutants was limited by the necessity to test individually each mutant on plant. This type of  
67 work has never been performed on *Dickeya* strains. To have a more complete view of the  
68 genes required for the virulence of *Dickeya*, we used a high-throughput sequencing of a  
69 saturated transposon library (Tn-seq) to screen tens of thousands random insertion mutants of  
70 *D. dadantii* in laboratory medium and during infection of chicory. Tn-seq has been  
71 extensively used to uncover essential genes required for mouse colonization by human  
72 pathogens *Vibrio cholerae* [24], *Pseudomonas aeruginosa* [25] and *Streptococcus*  
73 *pneumoniae* [26]. Thus, Tn-seq is a very powerful method to identify genes required for  
74 bacterial growth in their host. However, this technology has not yet been employed to unveil  
75 genes required for the multiplication of a phytopathogen in a plant host. By applying this  
76 technique to screen a *D. dadantii* mutant library in chicory, we identified metabolic pathways  
77 and bacterial genes required for growth *in planta*. Among them, we found a cluster of genes  
78 required for flagellin glycosylation, a modification known to be important for several plant  
79 pathogenic bacteria virulence.

80

81

## 82 **Results and discussion**

83

### 84 **Characterization of *D. dadantii* 3937 *Himar1* transposon library**

85 Many tools are available to perform Tn-seq [27]. In order to perform a Tn-seq experiment  
86 with *D. dadantii* 3937, we used a *Himar9* mariner transposon derivative carrying MmeI  
87 restriction sites in the inverted repeats (IR) and a kanamycin resistance cassette between the  
88 IRs [28]. We realized a biparental mating between *E. coli* and *D. dadantii* on M63 agar  
89 medium without carbon source and amino acids. We obtained approximately 300 000

90 colonies that were pooled. Subsequent DNA sequencing (see below) showed the presence of  
91 transposon insertions in amino acid biosynthesis pathways, demonstrating that mating on  
92 M63 minimal medium does not prevent the obtention of auxotroph mutants. To identify  
93 essential genes, mutants were grown in LB medium during several generations. Two DNA  
94 libraries were prepared from two cultures and subjected to high-throughput sequencing. The  
95 mariner transposon inserts into TA dinucleotides. The TPP software [29] was used to  
96 determine the number of reads at each TA site for each biological replicate. *D. dadantii*  
97 genome has 171 791 TA sites that can be targeted by the *Himar9* transposase. Pairs of  
98 biological replicates were compared. 37 794 and 48 101 unique insertions in TAs were  
99 detected in each sample, which corresponds to 22 and 28% density of insertion respectively  
100 (Table 1). The average number of reads per TA is 88 and 75, respectively. The results were  
101 reproducible with a Pearson correlation coefficient of 72% (Fig. S1) The location of the  
102 unique insertions showed an even distribution around the chromosome (Fig. 1A). For each  
103 gene, we calculated a  $\log_2FC$  corresponding to a ratio between the measured number of reads  
104 and the expected number of reads. The density plot (Fig. 1B) indicates that essential and non-  
105 essential genes are easily distinguishable, confirming the good quality of our Tn-seq libraries.  
106 Then, gene essentiality of the Tn-seq input libraries was determined by using the TRANSIT  
107 software [29]. We decided to use the Hidden Markov Model (HMM) which predicts  
108 essentiality and non-essentiality for individual insertion sites because it has been shown to  
109 give good prediction in datasets with density as low as 20% [29]. The HMM analysis led to  
110 the identification of 665 genes essential for growth in LB (ES), representing 14% of the genes  
111 of *D. dadantii* 3937, a number in the range of those found for this type of analysis with  
112 bacteria. 552 genes were categorized as Growth Defect genes (GD, i.e. mutations in these  
113 genes lead to loss of fitness), 125 as growth advantage genes (GA, i.e. mutations in these  
114 genes lead to gain of fitness) and 3320 as non-essential genes (NE) (table S2).

115 **TABLE 1** Tn-Seq analysis of *Dickeya dadantii* 3937  
 116

| Mutant pool | Total no. of reads | No. of reads containing Tn end | No. of reads normalized <sup>a</sup> | No. of mapped reads to unique TA sites | No. of mapped reads to unique TA sites after LOESS correction | Density (%) <sup>b</sup> | Mean read count <sup>c</sup> |
|-------------|--------------------|--------------------------------|--------------------------------------|----------------------------------------|---------------------------------------------------------------|--------------------------|------------------------------|
| LB #1       | 23,152,186         | 22,647,343                     | 18,748,028                           | 13,166,770 (70 %)                      | 12,904,900 (69 %)                                             | 28 %                     | 75                           |
| LB #2       | 30,105,412         | 27,963,154                     | 18,748,028                           | 15,535,291 (83 %)                      | 15,195,582 (81 %)                                             | 22 %                     | 88                           |
| Chicory #1  | 18,925,029         | 18,748,028                     | 18,748,028                           | 17,535,146 (94 %)                      | 14,906,888 (79 %)                                             | 24 %                     | 87                           |
| Chicory #2  | 27,607,717         | 26,555,297                     | 18,748,028                           | 17,477,706 (93 %)                      | 16,955,724 (90 %)                                             | 23 %                     | 99                           |

117 <sup>a</sup> The number of reads containing the sequence of a Tn end were normalized for each sample  
 118 according to the number of reads for the sample Chicory #1

119 <sup>b</sup> *Dickeya dadantii* 3937 genome has 171,791 TA sites. The density is the % of TAs for which mapped  
 120 reads has been assigned by the TPP software.

121 <sup>c</sup> the mean value of mapped reads per TA.  
 122

123 **Genes necessary for chicory leaf maceration.** We used chicory leaf infection as a model to  
 124 identify *D. dadantii* genes required for growth in plant tissues. Biological duplicates were  
 125 performed to insure the reproducibility of the results. Each chicory was inoculated with 10<sup>7</sup>  
 126 bacteria from the mutant pool and after 2 days more than 10<sup>10</sup> bacteria were collected from  
 127 the rotten tissue. Sequencing transposon insertion sites in these bacteria followed by the TPP  
 128 analysis indicated a density of unique insertion in TAs comparable to that of the input  
 129 datasets (23-24%). Surprisingly, the results were more highly reproducible than in LB with a  
 130 very high Pearson correlation coefficient of 98% (Fig. S1).

131 In order to identify genes of *D. dadantii* conferring loss or gain of fitness *in planta*, we  
 132 performed the RESAMPLING analysis of the TRANSIT software. The RESAMPLING  
 133 method is a variation of the classical permutation test in statistics that sums the reads at all  
 134 TA sites for each gene in each condition. It then calculates the difference of the sum of read-  
 135 counts between the input (LB) and output (chicory) datasets. The advantage of this statistical  
 136 method is to attribute for each gene an adjusted p-value (q-value). Genes with a significant  
 137 difference between total read-counts in LB and chicory achieve a q-value ≤ 0.05. The method  
 138 also calculates a log<sub>2</sub> fold-change (log<sub>2</sub>FC) for each gene based on the ratio of the sum of

139 read counts in the output datasets (chicory) versus the sum of read counts in the input (LB)  
140 datasets [29]. Applied to our Tn-seq datasets and selecting only genes achieving a q-value  $\leq$   
141 0.05, we identified 122 genes out of 4666 required for fitness *in planta*, as shown with the  
142 volcano plot of RESAMPLING results comparing replicates grown in LB versus *in planta*  
143 (Fig. S2). From this 122 genes, we applied an additional cutoff by removing 20 genes with a  
144 mean read count in LB  $<5$  (less than 5 reads in average / TA). These genes were categorized  
145 as ES or GD in LB. We also removed from the analysis 6 genes with a  $\log_2FC$  comprised  
146 between -2 and 2. By applying all these criteria, we retained only 96 genes for a further  
147 analysis (Fig. 2). 92 of them were identified as GD genes in the chicory ( $\log_2FC \leq 2$ ), the 4  
148 left as GA genes in the chicory ( $\log_2FC \geq 2$ ). Some of these genes, in bold in Fig 2, were  
149 already known to play a role in *D. dadantii* virulence, confirming the validity of the Tn-seq  
150 approach. Using the Kyoto Encyclopedia of Genes and Genomes (KEGG) [30], we  
151 discovered that certain metabolic pathways and biological functions are very important for  
152 growth in chicory (Table S3). We highlight some of them in the next sections of the article.

153

#### 154 **Analysis of the genes of *D. dadantii* required for plant colonization.**

155 **(i) Metabolism.** Chicory appears as an environment in which amino acids, nucleic acids and  
156 some vitamins (pyridoxal) are scarce. Of the 92 genes identified as GD genes *in planta*, 8 are  
157 involved in purine and 7 in pyrimidine metabolisms (table S3). In the purine metabolism  
158 pathway, the inosine monophosphate (IMP) biosynthesis pathway that produces IMP from L-  
159 glutamine and 5-phosphoribosyl diphosphate is particularly important for *D. dadantii in*  
160 *planta* since 5 out of the 10 genes of this pathway are significantly GD genes *in planta* (Fig.  
161 3). IMP is the precursor of adenine and guanine. Next, IMP can be converted in xanthosine  
162 5'-phosphate (XMP) by the IMP dehydrogenase GuaB. *guaB* gene is also a GD gene *in*  
163 *planta*, with a strong  $\log_2FC$  of -10.06 (Fig. 3). In the pyrimidine synthesis, the uridine

164 monophosphate (UMP) biosynthesis pathway that converts L-glutamine to UMP, a precursor  
165 of uracyl, is very important *in planta* since *carAB*, *pyrB*, *pyrC* and *pyrE*, involved in this  
166 enzymatic pathway, are all required for growth *in planta* (Fig. 3). This pyrimidine  
167 biosynthesis pathway is specific to bacteria. It is noteworthy that in the human pathogen *S.*  
168 *pneumoniae*, mutants of this pathway have a fitness defect in the nasopharynx of infected  
169 mice [26]. Hence, it looks that the pyrimidine biosynthesis pathway is particularly important  
170 for multiplication of some bacterial species in the host.

171 Mutants in genes involved in the synthesis of sulfur-containing amino acids (*cysIJQ*, *metB*),  
172 lysine (*lysA*) and leucine (*leuABC*) are disadvantaged in chicory (Fig. 2 and Fig. 4A). These  
173 amino acids are known to be present in low concentration in plant tissues. Other amino acids  
174 seem to be present in quantity sufficient for growth of *D. dadantii* auxotrophs. Low level of  
175 certain amino acids probably induces the stringent response in the bacteria. Reduced growth  
176 in the plant of the *relA* mutant, unable to synthesize the alarmone ppGpp, supports this  
177 hypothesis. Glucose is the main sugar present in plant tissue, present as a circulating sugar or  
178 a cellulose degradation product. Mutants in the PTS glucose transport system genes *ptsI* and  
179 *ptsG* have a reduced growth in bacteria (Fig. 2) showing its importance as a carbon source in  
180 planta.

181 Degradation of cell wall pectin by a battery of extracellular enzymes is the main determinant  
182 of *Dickeya* pathogenicity. Mutants unable to produce or to secrete these enzymes by the type  
183 II Out secretion system were not disfavored in chicory since these mutants could use for their  
184 growth the pectin degradation compounds produced by enzymes secreted by other bacteria.  
185 The redundancy of oligogalacturonate specific porins (KdgM and KdgN) and inner  
186 membrane transporters (TogT and TogMNABC) allow entry of these compounds into the  
187 bacteria even in a mutant in one of these transport systems. However, *kduI* mutants, blocked



188 in the intracellular part of the pectin degradation pathway, have a limited growth *in planta*,  
189 confirming the importance of the pectin degradation pathway in the disease progression.

190 **(ii) Stress resistance.** Plant is an hostile environment for the bacteria that has to cope with  
191 antimicrobial peptides, ROS, toxic compounds and acidic pH [31]. We observed that the  
192 pump AcrABTolC, that can efflux a wide range of compounds [32], is important for survival  
193 in chicory (Fig. S3). Stress can lead to the accumulation of phospholipids in the outer  
194 membrane. This accumulation makes the bacteria more sensitive to small toxic molecules  
195 [33]. Such a phospholipid accumulation probably occurs when the bacteria infect chicory  
196 since *miaC* and *miaF* mutants, which are unable to prevent phospholipid accumulation in the  
197 outer membrane, have a reduced growth in plant. Production of exopolysaccharides (EPS)  
198 was shown to protect the bacteria during the first steps of infection [9]. We observed that  
199 *rffG* and *wzx* mutants unable to synthesize EPS have a growth defect in chicory. A set of  
200 genes required to repair or degrade altered proteins (*clpA*, *degQ*, *trxB*) are also important for  
201 survival *in planta*. No gene directly involved in detoxification of ROS was detected in our  
202 analysis. However, ROS can create DNA damage. The two helicases involved in DNA repair,  
203 UvrD and HelD, give growth advantage in plant. Osmoregulated periplasmic glycans (OPG)  
204 are polymers of glucose found in the periplasm of  $\alpha$ ,  $\beta$  and  $\gamma$  proteobacteria. Their exact role  
205 is unknown but their absence leads to avirulence in certain bacteria such as *D. dadantii* [34].  
206 This absence induces a membrane stress that is sensed and transduced by the Rcs envelope  
207 stress response system. This system controls the expression of many genes, including those  
208 involved in motility, and those encoding plant cell wall degrading enzymes through the  
209 RsmA-RsmB system [35-37]. Thus, mutants defective in OPG synthesis are expected to have  
210 a reduced virulence. Indeed, in our experiment, mutants in the two genes involved in OPG  
211 synthesis, *opgG* and *opgH* were non competitive in chicory (Fig. 2).

212 **(iii) Iron uptake.** *D. dadantii* produces two types of siderophores, achromobactin and  
213 chrysobactin, that are required for the development of maceration symptoms in the iron  
214 limited environment of plant hosts [38]. Once iron loaded, the siderophores are imported into  
215 the bacteria. Import through the outer membrane requires a specific outer membrane channel  
216 and the energy transducing complex formed by TonB ExbB and ExbD. While the absence of  
217 synthesis of one of the siderophores can be compensated by the presence of siderophore  
218 secreted by other bacteria in the growth medium, mutants of the TonB complex are totally  
219 unable to acquire iron and thus are unable to grow in the plant. In accordance, *tonB* was  
220 essential in chicory while the genes coding for siderophore synthesis or secretion were not.  
221 Similarly a mutant devoid of the iron-loaded chrysobactin transport gene (*fct*) is non-  
222 competitive.

223 **(iv) Regulation.** Mutants in several genes controlling virulence factor production have a  
224 growth defect in the plant. The master regulator FlhDC acts as a regulator of both flagella and  
225 virulence factor synthesis in many bacteria such as *Yersinia ruckeri*, *Edwardsiella tarda* and  
226 *Ralstonia solanacearum* [39-41]. In *D. dadantii* FlhDC has recently been shown to control, in  
227 addition to flagellar motility, type III secretion system and virulence factor synthesis through  
228 several pathways [42]. We observed that *flhC* gives a growth advantage in chicory. In  
229 addition, we uncovered that some genes regulating *flhDC* in other bacteria regulate *D.*  
230 *dadantii* virulence, probably by controlling *flhDC* expression. *rsmC* is a poorly characterized  
231 gene in *D. dadantii* but that has been studied in *Pectobacterium carotovorum*. It negatively  
232 controls motility and extracellular enzyme production through modulating transcriptional  
233 activity of FlhCD [43]. HdfR is a poorly characterized LysR family regulator that controls the  
234 *std* fimbrial operon in *S. enterica* and FlhDC expression in *E. coli* [44]. *rsmC* mutants were  
235 overrepresented in the chicory (Fig. 4B), indicating a gain of virulence for these mutants.

236 *hdfR* conferred fitness benefits during growth in chicory and could also act in *D. dadantii* as  
237 activator of *flhDC* expression.

238 The GGDEF proteins are c-di-GMP synthase. Their gene are often located next to their  
239 cognate EAL diguanylate phosphodiesterase gene. *ecpC* (*yhjH*) encodes an EAL protein that  
240 was shown to activate virulence factor production in *D. dadantii* [45]. *gcpA*, which is located  
241 next to *ecpC* encodes a GGDEF protein. However, a *gcpA* mutant could not be constructed  
242 and analysed in this previous study. We observed that *gcpA* mutants (Dda\_03858) were  
243 overrepresented in chicory (Fig. 2). This increased virulence is a phenotype opposite to that  
244 described for the *ecpC* mutants, indicating that overproduction of c-di-GMP could reduce *D.*  
245 *dadantii* virulence.

246 Of the eighteen regulators of the LacI family present in *D. dadantii*, four of them were found  
247 to be involved in plant infection [46]. One of those, LfcR, which has been found important  
248 for infection of chicory, Saintpaulia and Arabidopsis, was identified as important for chicory  
249 infection in our experiment. LfcR is a repressor of adjacent genes [46]. Surprisingly none of  
250 these genes appeared to play a role for chicory infection suggesting that other targets of LfcR  
251 probably remain to be discovered.

252 Finally, it is noteworthy to mention that the *ackA* and *pta* genes are GD *in planta*. These  
253 genes constitute the reversible Pta-AckA pathway. The steady-state concentration of acetyl-  
254 phosphate (acetyl-P), a signaling molecule in bacteria, depends upon the rate of its formation  
255 catalyzed by Pta and of its degradation catalyzed by AckA [47]. The GD phenotype of *D.*  
256 *dadantii* *ackA* and *pta* mutants during infection suggests that acetyl-P might play a crucial  
257 signaling role in the adaptation of *D. dadantii* to the plant tissue.

258 **(v) Motility.** Motility is an essential virulence factor of *D. dadantii* required to move on the  
259 surface of the leaf, enter the wounds and propagate into the plant tissue [48-50]. Accordingly,  
260 all the genes required for flagella synthesis, the flagella motor and genes regulating their

261 synthesis (*flhC*, *flhD*, *fliA*) (see above) are necessary for fitness during chicory infection (Fig.  
262 4C and 5A). All the genes responsible for the transduction of the chemotaxis signal (*cheA*, *B*,  
263 *R*, *W*, *X*, *Y* and *Z*) also confer a benefit in planta (Fig. 2). No methyl-accepting chemoreceptor  
264 gene mutant was found. Like other environmental bacteria, *D. dadantii* encodes many such  
265 proteins (47). They probably present some redundancy in the recognized signal which  
266 prevented their detection by our screen.

267

### 268 ***D. dadantii* flagellin is modified by glycosylation**

269 A group of six genes located between *fliA* and *fliC* retained our interest since insertions in  
270 these genes led to a growth defect in chicory (Fig. 5A). Dda3937\_03424 encodes an O-linked  
271 N-acetylglucosamine transferase and Dda3937\_03419 encode a protein with a nucleotide  
272 diphospho sugar transferase predicted activity. The other ones could be involved in the  
273 modification of sugars (predicted function of Dda3937\_03423: nucleotide sugar  
274 transaminase, Dda3937\_03422: carbamoyl phosphate synthase, Dda3937\_03421:  
275 oxidoreductase; Dda3937\_03420: methyltransferase). Their location let suppose that this  
276 group of genes could be involved in flagellin glycosylation. Analysis by SDS-PAGE of FliC  
277 produced by the wild type, and the A4277 and A3422 strains (Dda3937\_03424 and  
278 Dda3937\_03419 mutants, respectively) showed that in the two latter strains the molecular  
279 weight of the protein diminished (Fig. 5B). The molecular weight determined by mass  
280 spectroscopy was 28911 Da for FliCA4277, 31034 Da for FliCA3422 and 32258 Da for the  
281 WT FliC. Thus, in the wild type strain FliC is modified by the products of the genes  
282 Dda\_03424 to Dda\_03419, probably by multiple glycosylation with a disaccharide. Absence  
283 of modification did not modify *D. dadantii* motility (data not shown). The flagellin of the  
284 plant pathogens *Pseudomonas syringae* pv *tabaci* and *Burkholderia cenocepacia* are also  
285 glycosylated and absence of this modification lowered the ability of these bacteria to cause

286 disease on tobacco and arabidopsis, respectively [51, 52]. Accordingly, in *D. dadantii*, FliC  
287 modification appears important for multiplication of the bacteria in plant.

288

### 289 **Additional genes could be involved in virulence**

290 Several genes have a  $\log_2FC >4$  or  $<-4$  but do not satisfy the statistical permutation test  
291 adjusted by the false discovery rate method (q-value) (table S4). However, most of them  
292 belong to the categories described above and could be required for growth in planta. Among  
293 those with a  $\log_2FC < -4$  can be found genes involved in amino acid and nucleic acid synthesis  
294 (*cysH*, *ilvC*, *pyrF*, *pyrD*, *purC*, *thrC*, *metA*, *cysK*, *lysC*), flagella and motility (*flgJ*, *fliO*, *flgC*,  
295 *fliS*, *flgG*, *flgA*, *flgL*, *cheW*, *fliN*, *fliP*, *fliK*, *fliG*, *fliL*), pectin and glucose metabolism (*kduD*,  
296 *pgi*), EPS synthesis (*gmd*), flagella glycosylation (*vioA*) and regulation (*zur*, *ecpC* and the  
297 general RNA chaperone *hfq*).

298 Among the genes with a  $\log_2FC > 4$ , three regulators can be noticed: *pecS*, *pecT* and  
299 *Dda3937\_00840*. *pecS* and *pecT* are known regulators of *D. dadantii* controlling the  
300 expression of many factors involved in virulence (ref, ref). Thus, their mutation could confer  
301 an increased fitness of the bacteria in chicory. *D. dadantii* possesses a functional *expI-expR*  
302 quorum sensing system which does not seem to control plant virulence factor production  
303 (Nasser). However, several LuxR family regulator genes which are not associated with a *luxI*  
304 gene are present in the genome of the bacteria. Mutants of one of them (*Dda3937\_00840*) are  
305 overrepresented in the chicory. Its product is probably a repressor of genes conferring an  
306 increased fitness *in planta*.

307

308

### 309 **Validation of the Tn-seq results.**

310 To validate the Tn-seq results, we performed coinoculation experiments in chicory leaves  
311 with the wild type strain and various mutants in genes conferring a growth advantage, a  
312 growth defect or no fitness benefit in a 1/1 ratio. We calculated a competitiveness index (CI) by  
313 counting the number of each type of bacteria in the rotten tissue after 24 h. We found a  
314 correlation between the competitiveness index of mutants with the  $\log_2FC$  of the corresponding  
315 genes with a Pearson coefficient of 0.50 (Fig. 6), indicating that Tn-seq is a reliable technique  
316 to identify genes involved in plant colonization and virulence. Additional validations were  
317 performed by inoculation of uncharacterized leucine and cytosine auxotroph mutants in  
318 chicory leaves which confirmed that these mutants are unable to grow in plant and are thus  
319 avirulent (Fig S4).

320

321

## 322 **Conclusion**

323 This Tn-seq experiment highlights new factors required for *D. dadantii* successful rotting of  
324 chicory. Many genes known to be important for pathogenesis were not found in this screen  
325 because their products are secreted and can be shared with other strains in the community.  
326 This includes all the proteins secreted by the type II secretion system and small molecules  
327 such as siderophores and butanediol. Other categories of genes were not found: for example,  
328 no genes involved in response to acidic or oxidative stresses were identified. Chicory has  
329 been described as an inadequate model to study the response of *D. dadantii* to oxidative stress  
330 (touati, expert). Similarly, the type III *hrp* genes were not identified in our study. The Hrp  
331 system is not necessary for *D. dadantii* virulence and in our experimental conditions (high  
332 inoculum on isolated chicory leaves) the necrotrophic capacities of *D. dadantii* (production of  
333 plant cell wall degrading enzymes) is probably sufficient to provoke the disease. Studies on  
334 other host plants will allow to determine all the full virulence repertoire of the bacteria.

335 Our results give also some information on the metabolic status of the plant. The amount of  
336 nucleic acids and of the amino acids cysteine, leucine, methionine, threonine and isoleucine is  
337 too low in chicory to allow the multiplication of mutant bacteria. Some enzymatic steps  
338 involved in their synthesis are specific to bacteria and fungi. Thus, they could be good target  
339 for the development of specific inhibitors [53] to fight *D. dadantii*.

340 While Tn-seq has been used to study genes required for the infection of animals, there has  
341 been no genome-wide study of factors necessary for a plant pathogen to develop and provoke  
342 disease on a plant. Besides the genes of known function described in the Result section, this  
343 study allowed the identification of several genes of unknown function required for chicory  
344 rotting. Repetition of this experiment with other strains or on other plants will tell if these  
345 genes encode strain or host specific virulence factors.

346

## 347 **Methods**

348 **Bacterial strains and growth conditions.** Bacterial strains, phages, plasmids and  
349 oligonucleotides used in this study are described in Table S1. *D. dadantii* and *E. coli* cells  
350 were grown at 30 and 37°C respectively in LB medium or M63 minimal medium  
351 supplemented with a carbon source (2 g/L). When required antibiotics were added at the  
352 following concentration: ampicillin, 100 µg/L, kanamycin and chloramphenicol, 25 µg/L.  
353 Media were solidified with 1.5 g/L agar. Transduction with phage PhiEC2 was performed  
354 according to [54]. The motility of each mutant was compared with that of the wild-type strain  
355 on semisolid (0.4%) LB agar plates as previously described [55].

## 356 **Construction of the transposon library**

357 Five mL of an overnight culture of *D. dadantii* strain A350 and of *E. coli* MFDpir/pSamEC  
358 were mixed and centrifuged 2 min at 6000 g. The bacteria were resuspended in 1 mL of M63

359 medium and spread onto a 0.45  $\mu$ m cellulose acetate filter placed on a M63 medium agar  
360 plate. After 8h, bacteria were resuspended in 1 mL M63 medium. An aliquot was diluted and  
361 spread onto LB agar + kanamycin plates to estimate the efficiency of mutagenesis. The other  
362 part was inoculated in 100 mL of LB medium + kanamycin and grown for 24 h at 30°C. To  
363 confirm that the bacteria that grew were *D. dadantii* strains with a transposon but without  
364 plasmid pSamEC, we checked that all the grown bacteria were kan<sup>R</sup>, amp<sup>S</sup> and  
365 diaminopimelate (DAP) prototrophs (MFDpir is DAP). The bacteria were frozen in 40%  
366 glycerol at -80°C and represent a library of about 300 000 mutants.

### 367 **DNA preparation for high-throughput sequencing**

368 An aliquot of the mutant library was grown overnight in LB medium + kanamycin. To  
369 identify essential genes in LB, the culture was diluted 100-fold in LB and grown for 6 h. To  
370 infect chicory, the overnight culture was centrifuged and resuspended at OD<sub>600</sub> = 1 in M63  
371 medium. Chicories cut in half were inoculated with 10  $\mu$ L of this bacterial suspension and  
372 incubated at 30°C with maximum moist. After 60 h, the rotten tissue was collected and  
373 filtered through a cheesecloth. The bacteria were collected by centrifugation and washed  
374 twice in M63 medium. DNA was extracted from 1.5 mL aliquots of bacterial suspension  
375 adjusted to OD<sub>600</sub>1.5 with the Promega Wizard Genomic DNA purification kit. Next steps of  
376 the DNA preparation methods were adapted from [25]. All DNA gel-extraction were  
377 performed onto a blue-light transilluminator of DNA stained with gel-green (Biotium) to  
378 avoid DNA mutation and double-stranded breaks. 50  $\mu$ g of DNA samples were digested with  
379 50 U MmeI in a total volume of 1.2 mL for one hour at 37°C according to manufacturer's  
380 instructions, then heat-inactivated for 20 minutes at 80°C, purified (QIAquick, PCR  
381 purification kit Qiagen) and concentrated using a vacuum concentrator to a final volume of  
382 25  $\mu$ L. Digested DNA samples were run on a 1% agarose gel, the 1.0–1.5 kb band containing  
383 the transposon and adjacent DNA was cut out and DNA was extracted from the gel according



384 to manufacturer's instructions (Qiaquick Gel Extraction Kit, Qiagen). This allowed recovery  
385 of all the fragments containing genomic DNA adjacent to transposons (1201 bp of  
386 transposable element with 32-34 bp of genomic DNA). A pair of single-stranded  
387 complementary oligonucleotides containing an unique 5-nt barcode sequence (LIB\_AdaptT  
388 and LIB\_AdaptB) was mixed and heated to 100°C, then slowly cooled down in a water bath  
389 to obtain double-stranded adaptors with two-nucleotide overhangs. 1 µg DNA of each sample  
390 was ligated to the barcoded adaptors (0.44 mM) with 2000 U T4 DNA ligase in a final  
391 volume of 50 µL at 16°C overnight. Five identical PCR reactions from the ligation product  
392 were performed to amplify the transposon adjacent DNA. One reaction contained 100 ng of  
393 DNA, 1 unit of Q5 DNA polymerase (Biolabs), 1X Q5 Buffer, 0.2 mM dNTPs, 0.4 µM of the  
394 forward primer (LIB\_PCR\_5, which anneals to the P7 Illumina sequence of the transposon)  
395 and the reverse primer (LIB\_PCR\_3, which anneals to the P5 adaptor). Only 18 cycles were  
396 performed to keep a proportional amplification of the DNA. Samples were concentrated  
397 using a vacuum concentrator to a final volume of 25 µL. Amplified DNA was run on a 1.8%  
398 agarose gel and the 125 bp band was cut-out and gel extracted (QIAquick, PCR purification  
399 kit Qiagen). DNA was finally dialysed (MF-Millipore™ Membrane Filters) for 4 hours.  
400 Quality control of the Tn-seq DNA libraries (size of the fragments and concentration) and  
401 High-throughput sequencing on HiSeq 2500 (Illumina) was performed by MGX (CNRS  
402 sequencing service, Montpellier). 6 DNA libraries were multiplexed on one flow-cell. After  
403 demultiplexing, the total number of reads was comprised between 18 and 31 millions (Table  
404 1).

405

#### 406 **Bioinformatics analysis:**

407 Raw reads from the fastQ files were first filtered using cutadapt v1.11 [56] and only reads  
408 containing the *mariner* inverted left repeat (ACAGGTTGGATGATAAGTCCCCGGTCTT)

409 were trimmed and considered *bona fide* transposon-disrupted genes. Trimmed reads were  
410 then analyzed using a modified version of the TPP script available from the TRANSIT  
411 software v2.0.2 [29]. The mapping step was modified to select only reads mapping uniquely  
412 and without mismatch in the *D. dadantii* 3937 genome (Genbank CP002038.1). Then, the  
413 counting step was modified to accurately count the reads mapping to each TA site in the  
414 reference genome according to the Tn-seq protocol used in this study. Read counts per  
415 insertion were normalized using the LOESS method as described in [57]. We next used the  
416 TRANSIT software (version 2.0) to compare the Tn-seq datasets.

417

418 **Strain construction.** To construct the A4277 strain, gene *Dda3937\_03424* was  
419 amplified with the oligonucleotides 19732+ and 19732-. The resulting fragment was  
420 inserted into the pGEM-T plasmid (Promega). A *uidA*-kan<sup>R</sup> cassette [58] was inserted  
421 into the unique AgeI site of the fragment. The construct was recombined into the *D.*  
422 *dadantii* chromosome according to [59]. Recombination was checked by PCR.

423

424 **Protein techniques.** Flagella were prepared from overnight LB grown cells.  
425 Bacteria were pelleted, resuspended in 1/10 volume of water and passed 20 fold through  
426 a needle on a syringe. Cells and cells debris were removed by centrifugation 5 min at 20  
427 000 x g [55]. Proteins were analyzed by SDS-polyacrylamide gel electrophoresis (SDS-  
428 PAGE).

429

430 **Coinoculation experiments.** To determine the competitiveness index, the wild type strain  
431 and the mutant to test, marked with an antibiotic resistance gene, were grown overnight in  
432 M63 + glycerol medium. Bacteria were washed in M63 medium and the OD<sub>600</sub> was adjusted  
433 to 1.0. Bacteria were mixed to a 1:1 ratio and diluted 10-fold. 10 uL of the mixture were

434 inoculated into chicory leaves. The wound was covered with mineral oil and the leaves were  
435 incubated at 30 °C at high humidity. After 24 h the rotten tissue was collected, homogenized,  
436 diluted in M63 and spread onto LB and LB + antibiotic plates. After 48 h at 30°C, colonies  
437 were counted. The competitiveness index is the ratio (number of mutant bacteria/number of WT  
438 bacteria) in the rotten tissue / (number of mutant bacteria/number of WT bacteria) in the  
439 inoculum.

440

## 441 **References**

442

443

444

## 445 **Legend of figures**

446

### 447 **Fig. 1. Quality control of the Tn-seq *D. dadantii* 3937 libraries.**

448 (A) Frequency and distribution of transposon sequence reads across the entire *D. dadantii*  
449 3937 genome. The localization of transposon insertions shows no bias throughout the genome  
450 of *D. dadantii* 3937. B) Density plot of log<sub>2</sub>FC (measured reads/expected reads per gene).

451

### 452 **Fig 2. Genes identified by Tn-seq exhibiting a fitness change in chicory compared to LB.**

453 Data were obtained with the TRANSIT software. From left to right : (a) classification of the  
454 gene with the HMM method performed in the LB dataset. (b) Number of TA sites left after  
455 removing 10% of 5' and 3' extremities. (c) Mean read number per gene in the LB or chicory  
456 dataset. (d) Ratio of read number between chicory and LB expressed in log<sub>2</sub>. (e) p-values  
457 adjusted for multiple comparisons using the false-discovery rate method. Genes for which a  
458 role in *D. dadantii* virulence has been described before are in bold.

459 **Fig 3. Scheme of the purine and pyrimidine biosynthesis pathways in *D. dadantii* that**  
460 **produce XMP (purine metabolism) and UMP (pyrimidine metabolism) from L-**  
461 **glutamine.**

462 In red are indicated the growth defect genes in chicory that pass the permutation test ( $q$ -value  
463  $\leq 0.05$ ). The  $\log_2FC$  of read numbers between chicory and LB for each gene is indicated in  
464 bracket. Some genes do not pass the permutation test (in black) but have a strong negative  
465  $\log_2FC$ . PRPP: 5-phosphoribosyl-1-pyrophosphate ; GAR: 5'-phosphoribosyl-1-glycinamide  
466 ; FGAM: 5'-phosphoribosyl-*N*-formylglycinamide ; AIR: 5'-phosphoribosyl-5-  
467 aminoimidazole ; CAIR: 5'-phosphoribosyl-5-aminoimidazole carboxylic acid ; SAICAR: 5'-  
468 phosphoribosyl-4-(*N*-succino-carboxamide)-5-aminoimidazole ; AICAR: 5-aminoimidazole-  
469 4-carboxamide ribonucleotide ; IMP: inosine monophosphate ; XMP: xanthine  
470 monophosphate ; UMP: uridine monophosphate.

471

472 **Fig 4. Examples of essential and important genes revealed by Tn-seq.**

473 Number of reads at each transposon location in the sample grown in LB or in chicory. Data  
474 are averaged from biological replicates and normalized as described in the method section.  
475 Three regions of the genome representative of Tn-seq results are shown, with the predicted  
476 genes represented at the bottom of each panel. Peaks represent read number at TA sites.  
477 Black arrows represent genes that pass the permutation test ( $q$ -value  $\leq 0.05$ ). (A) Essentiality  
478 of leucine biosynthetic genes in chicory. (B) Insertions in the 5' region of *rsmC* generate  
479 growth advantage for the bacteria in chicory. (C) Importance of genes involved in motility for  
480 growth in chicory.

481 **Fig 5. Modification of FliC revealed by Tn-seq analysis and SDS-PAGE. (A) Importance**  
482 **of 6 genes located between *fliA* and *fliC* for growth in chicory.  $\log_2FC$  are indicated in**  
483 **bracket. Dda3937\_03425 and Dda3937\_03426 are duplicated transposase genes that have**

484 been removed from the analysis. Black arrow: GD in chicory ( $q$ -value  $\leq 0.05$ ) ; white arrow:  
485 genes that do not pass the permutation test ( $q$ -value  $> 0.05$ ). (B) Analysis by SDS-PAGE of  
486 FliC produced by the wild type (lane 1), the A3422 (lane 2) and A4277 (lane 3) strains.

487

488 **Fig 6. Correlation between the competitiveness index (IC) of several mutant strains with**  
489 **the  $\log_2$ FC of the corresponding genes.** IC values were determined in chicory leaves as  
490 described in Methods. The IC values for *dltB*, *anrB*, *phoS* and *phoH* are from [60]. Each  
491 value is the mean of 5 experiments.

492

493 **Fig S1. Biological reproducibility of the Tn-seq results.**

494 Pairs of Tn-seq assay results are compared, with the total number of reads per gene plotted.  
495 Analysis of DNA samples corresponding to two independent cultures of the mutant pool  
496 grown (A) in LB medium (correlation coefficient  $R = 0.72$ ) and (B) in chicory (correlation  
497 coefficient  $R = 0.98$ ). Values represent average numbers of reads per gene from the pairs of  
498 biological replicates.

499

500 **Fig S2. Volcano plot of resampling results comparing replicates grown in chicory versus**  
501 **in LB.** Significant hits have  $q < 0.05$  or  $-\log_{10} q > 1.3$ . Growth defect (GD) or growth  
502 advantage (GA) genes are indicated by a red frame.

503 **Fig S3. *acrAB* are essential in chicory.** Number of Tn-seq reads at each insertion site in the  
504 *acrA acrB* region in samples grown in LB or in chicory. Data are averaged from biological  
505 replicates and normalized as described in Methods. *dnaX* which encodes both the tau and  
506 gamma subunits of DNA polymerase is represented by a grey arrow. *dnaX* is essential gene in  
507 LB. *acrAB* represented by grey arrows are GD in chicory ( $q$ -value  $\leq 0.05$ ).

508 **Fig S4. Pathogenicity tests on chicory with leucine (A5969) and cytosine (A5968)**  
509 **mutants of *D. dadantii*.**

510 Each leaf was inoculated with  $10^6$  bacteria. Length of rotten tissue was observed after 24h.

511

512

513 1. Adeolu M, Alnajar S, Naushad S, R SG. Genome-based phylogeny and taxonomy of  
514 the 'Enterobacteriales': proposal for Enterobacterales ord. nov. divided into the families  
515 Enterobacteriaceae, Erwiniaceae fam. nov., Pectobacteriaceae fam. nov., Yersiniaceae fam.  
516 nov., Hafniaceae fam. nov., Morganellaceae fam. nov., and Budviciaceae fam. nov. Int J Syst  
517 Evol Microbiol. 2016;66(12):5575-99. Epub 2016/09/14. doi: 10.1099/ijsem.0.001485.  
518 PubMed PMID: 27620848.

519 2. Charkowski A, Blanco C, Condemine G, Expert D, Franza T, Hayes C, et al. The  
520 Role of Secretion Systems and Small Molecules in Soft-Rot Enterobacteriaceae  
521 Pathogenicity. Annu Rev Phytopathol. 2012;50:425-49. PubMed PMID: 22702350.

522 3. Hugouvieux-Cotte-Pattat N, Condemine G, Nasser W, Reverchon S. Regulation of  
523 pectinolysis in *Erwinia chrysanthemi*. Annu Rev Microbiol. 1996;50:213-57. PubMed PMID:  
524 8905080.

525 4. Condemine G, Robert-Baudouy J. Analysis of an *Erwinia chrysanthemi* gene cluster  
526 involved in pectin degradation. Mol Microbiol. 1991;5(9):2191-202. PubMed PMID:  
527 1766386.

528 5. Reverchon S, Nasser W, Robert-Baudouy J. *pecS*: a locus controlling pectinase,  
529 cellulase and blue pigment production in *Erwinia chrysanthemi*. Mol Microbiol.  
530 1994;11(6):1127-39. Epub 1994/03/01. PubMed PMID: 8022282.

- 531 6. Surgey N, Robert-Baudouy J, Condemine G. The *Erwinia chrysanthemi* pecT gene  
532 regulates pectinase gene expression. *J Bacteriol.* 1996;178(6):1593-9. PubMed PMID:  
533 8626286.
- 534 7. Nasser W, Faelen M, Hugouvieux-Cotte-Pattat N, Reverchon S. Role of the nucleoid-  
535 associated protein H-NS in the synthesis of virulence factors in the phytopathogenic  
536 bacterium *Erwinia chrysanthemi*. *Mol Plant Microbe Interact.* 2001;14(1):10-20. Epub  
537 2001/02/24. doi: 10.1094/mpmi.2001.14.1.10. PubMed PMID: 11194867.
- 538 8. Lebeau A, Reverchon S, Gaubert S, Kraepiel Y, Simond-Cote E, Nasser W, et al. The  
539 GacA global regulator is required for the appropriate expression of *Erwinia chrysanthemi*  
540 3937 pathogenicity genes during plant infection. *Environ Microbiol.* 2008;10(3):545-59.  
541 PubMed PMID: 18177376.
- 542 9. Condemine G, Castillo A, Passeri F, Enard C. The PecT repressor coregulates  
543 synthesis of exopolysaccharides and virulence factors in *Erwinia chrysanthemi*. *Mol Plant*  
544 *Microbe Interact.* 1999;12(1):45-52. PubMed PMID: 9885192.
- 545 10. Reverchon S, Rouanet C, Expert D, Nasser W. Characterization of indigoidine  
546 biosynthetic genes in *Erwinia chrysanthemi* and role of this blue pigment in pathogenicity. *J*  
547 *Bacteriol.* 2002;184(3):654-65. Epub 2002/01/16. PubMed PMID: 11790734; PubMed  
548 Central PMCID: PMCPMC139515.
- 549 11. Condemine G, Dorel C, Hugouvieux-Cotte-Pattat N, Robert-Baudouy J. Some of the  
550 *out* genes involved in the secretion of pectate lyases in *Erwinia chrysanthemi* are regulated by  
551 *kdgR*. *Mol Microbiol.* 1992;6(21):3199-211. PubMed PMID: 1453958.
- 552 12. Yang CH, Gavilanes-Ruiz M, Okinaka Y, Vedel R, Berthuy I, Boccara M, et al. *hrp*  
553 genes of *Erwinia chrysanthemi* 3937 are important virulence factors. *Mol Plant Microbe*  
554 *Interact.* 2002;15(5):472-80. Epub 2002/05/31. doi: 10.1094/mpmi.2002.15.5.472. PubMed  
555 PMID: 12036278.

- 556 13. Li Y, Hutchins W, Wu X, Liang C, Zhang C, Yuan X, et al. Derivative of plant  
557 phenolic compound inhibits the type III secretion system of *Dickeya dadantii* via HrpX/HrpY  
558 two-component signal transduction and Rsm systems. *Molecular plant pathology*.  
559 2015;16(2):150-63. Epub 2014/07/06. doi: 10.1111/mpp.12168. PubMed PMID: 24986378.
- 560 14. Yang S, Peng Q, Zhang Q, Zou L, Li Y, Robert C, et al. Genome-wide identification  
561 of HrpL-regulated genes in the necrotrophic phytopathogen *Dickeya dadantii* 3937. *PLoS*  
562 *One*. 2010;5(10):e13472. Epub 2010/10/27. doi: 10.1371/journal.pone.0013472. PubMed  
563 PMID: 20976052; PubMed Central PMCID: PMC2957411.
- 564 15. Franza T, Mahe B, Expert D. *Erwinia chrysanthemi* requires a second iron transport  
565 route dependent of the siderophore achromobactin for extracellular growth and plant  
566 infection. *Mol Microbiol*. 2005;55(1):261-75. Epub 2004/12/23. doi: 10.1111/j.1365-  
567 2958.2004.04383.x. PubMed PMID: 15612933.
- 568 16. Franza T, Sauvage C, Expert D. Iron regulation and pathogenicity in *Erwinia*  
569 *chrysanthemi* 3937: role of the Fur repressor protein. *Mol Plant Microbe Interact*.  
570 1999;12(2):119-28. Epub 1999/02/02. doi: 10.1094/mpmi.1999.12.2.119. PubMed PMID:  
571 9926414.
- 572 17. Franza T, Expert D. The virulence-associated chrysobactin iron uptake system of  
573 *Erwinia chrysanthemi* 3937 involves an operon encoding transport and biosynthetic  
574 functions. *J Bacteriol*. 1991;173(21):6874-81. Epub 1991/11/01. PubMed PMID: 1657869;  
575 PubMed Central PMCID: PMC209040.
- 576 18. Okinaka Y, Yang CH, Perna NT, Keen NT. Microarray profiling of *Erwinia*  
577 *chrysanthemi* 3937 genes that are regulated during plant infection. *Mol Plant Microbe*  
578 *Interact*. 2002;15(7):619-29. Epub 2002/07/18. doi: 10.1094/mpmi.2002.15.7.619. PubMed  
579 PMID: 12118877.



- 580 19. Yang S, Perna NT, Cooksey DA, Okinaka Y, Lindow SE, Ibekwe AM, et al.  
581 Genome-wide identification of plant-upregulated genes of *Erwinia chrysanthemi* 3937 using  
582 a GFP-based IVET leaf array. *Mol Plant Microbe Interact.* 2004;17(9):999-1008. Epub  
583 2004/09/24. doi: 10.1094/mpmi.2004.17.9.999. PubMed PMID: 15384490.
- 584 20. Chapelle E, Alunni B, Malfatti P, Solier L, Pedron J, Kraepiel Y, et al. A  
585 straightforward and reliable method for bacterial in planta transcriptomics: application to the  
586 *Dickeya dadantii/Arabidopsis thaliana* pathosystem. *Plant J.* 2015;82(2):352-62. Epub  
587 2015/03/06. doi: 10.1111/tpj.12812. PubMed PMID: 25740271.
- 588 21. Reverchon S, Muskhelishvili G, Nasser W. Virulence Program of a Bacterial Plant  
589 Pathogen: The *Dickeya* Model. *Progress in molecular biology and translational science.*  
590 2016;142:51-92. Epub 2016/08/31. doi: 10.1016/bs.pmbts.2016.05.005. PubMed PMID:  
591 27571692.
- 592 22. Hinton JC, Sidebotham JM, Hyman LJ, Perombelon MC, Salmond GP. Isolation and  
593 characterisation of transposon-induced mutants of *Erwinia carotovora* subsp. *atroseptica*  
594 exhibiting reduced virulence. *Mol Gen Genet.* 1989;217(1):141-8. Epub 1989/05/01. PubMed  
595 PMID: 2549365.
- 596 23. Pirhonen M, Saarilahti H, Karlsson M-B, Palva ET. Identification of pathogenicity  
597 determinants of *Erwinia carotovora* subsp. *carotovora* by transposon mutagenesis. *Molecular*  
598 *Plant-Microbe Interaction.* 1991;4:276-83.
- 599 24. Fu Y, Waldor MK, Mekalanos JJ. Tn-Seq analysis of *Vibrio cholerae* intestinal  
600 colonization reveals a role for T6SS-mediated antibacterial activity in the host. *Cell host &*  
601 *microbe.* 2013;14(6):652-63. Epub 2013/12/18. doi: 10.1016/j.chom.2013.11.001. PubMed  
602 PMID: 24331463; PubMed Central PMCID: PMC3951154.
- 603 25. Skurnik D, Roux D, Aschard H, Cattoir V, Yoder-Himes D, Lory S, et al. A  
604 comprehensive analysis of in vitro and in vivo genetic fitness of *Pseudomonas aeruginosa*

- 605 using high-throughput sequencing of transposon libraries. PLoS Pathog. 2013;9(9):e1003582.  
606 Epub 2013/09/17. doi: 10.1371/journal.ppat.1003582. PubMed PMID: 24039572; PubMed  
607 Central PMCID: PMCPMC3764216.
- 608 26. van Opijnen T, Camilli A. A fine scale phenotype-genotype virulence map of a  
609 bacterial pathogen. Genome research. 2012;22(12):2541-51. Epub 2012/07/25. doi:  
610 10.1101/gr.137430.112. PubMed PMID: 22826510; PubMed Central PMCID:  
611 PMCPMC3514683.
- 612 27. van Opijnen T, Camilli A. Transposon insertion sequencing: a new tool for systems-  
613 level analysis of microorganisms. Nat Rev Microbiol. 2013;11(7):435-42. Epub 2013/05/29.  
614 doi: 10.1038/nrmicro3033. PubMed PMID: 23712350; PubMed Central PMCID:  
615 PMCPMC3842022.
- 616 28. Wiles TJ, Norton JP, Russell CW, Dalley BK, Fischer KF, Mulvey MA. Combining  
617 quantitative genetic footprinting and trait enrichment analysis to identify fitness determinants  
618 of a bacterial pathogen. PLoS Genet. 2013;9(8):e1003716. Epub 2013/08/31. doi:  
619 10.1371/journal.pgen.1003716. PubMed PMID: 23990803; PubMed Central PMCID:  
620 PMCPMC3749937.
- 621 29. DeJesus MA, Ambadipudi C, Baker R, Sassetti C, Ioerger TR. TRANSIT--A  
622 Software Tool for Himar1 TnSeq Analysis. PLoS computational biology.  
623 2015;11(10):e1004401. Epub 2015/10/09. doi: 10.1371/journal.pcbi.1004401. PubMed  
624 PMID: 26447887; PubMed Central PMCID: PMCPMC4598096.
- 625 30. Ogata H, Goto S, Sato K, Fujibuchi W, Bono H, Kanehisa M. KEGG: Kyoto  
626 Encyclopedia of Genes and Genomes. Nucleic Acids Res. 1999;27(1):29-34. Epub  
627 1998/12/10. PubMed PMID: 9847135; PubMed Central PMCID: PMCPMC148090.
- 628 31. Reverchon S, Nasser W. *Dickeya* ecology, environment sensing and regulation of  
629 virulence programme. Environ Microbiol Rep. 2013;5(5):622-36. PubMed PMID: 24115612.

- 630 32. Ravirala RS, Barabote RD, Wheeler DM, Reverchon S, Tatum O, Malouf J, et al.  
631 Efflux pump gene expression in *Erwinia chrysanthemi* is induced by exposure to phenolic  
632 acids. *Mol Plant Microbe Interact.* 2007;20(3):313-20. Epub 2007/03/24. doi: 10.1094/mpmi-  
633 20-3-0313. PubMed PMID: 17378434.
- 634 33. Malinverni JC, Silhavy TJ. An ABC transport system that maintains lipid asymmetry  
635 in the gram-negative outer membrane. *Proc Natl Acad Sci U S A.* 2009;106(19):8009-14.  
636 Epub 2009/04/23. doi: 10.1073/pnas.0903229106. PubMed PMID: 19383799; PubMed  
637 Central PMCID: PMCPMC2683108.
- 638 34. Page F, Altabe S, Hugouvieux-Cotte-Pattat N, Lacroix JM, Robert-Baudouy J, Bohin  
639 JP. Osmoregulated periplasmic glucan synthesis is required for *Erwinia chrysanthemi*  
640 pathogenicity. *J Bacteriol.* 2001;183(10):3134-41. PubMed PMID: 11325942.
- 641 35. Bouchart F, Boussemart G, Prouvost AF, Cogez V, Madec E, Vidal O, et al. The  
642 virulence of a *Dickeya dadantii* 3937 mutant devoid of osmoregulated periplasmic glucans is  
643 restored by inactivation of the RcsCD-RcsB phosphorelay. *J Bacteriol.* 2010;192(13):3484-  
644 90. Epub 2010/04/27. doi: 10.1128/jb.00143-10. PubMed PMID: 20418397; PubMed Central  
645 PMCID: PMCPMC2897653.
- 646 36. Madec E, Bontemps-Gallo S, Lacroix JM. Increased phosphorylation of the RcsB  
647 regulator of the RcsCDB phosphorelay in strains of *Dickeya dadantii* devoid of  
648 osmoregulated periplasmic glucans revealed by Phos-tag gel analysis. *Microbiology.*  
649 2014;160(Pt 12):2763-70. Epub 2014/10/17. doi: 10.1099/mic.0.081273-0. PubMed PMID:  
650 25320363.
- 651 37. Wu X, Zeng Q, Koestler BJ, Waters CM, Sundin GW, Hutchins W, et al. Deciphering  
652 the components that coordinately regulate virulence factors of the soft rot pathogen *Dickeya*  
653 *dadantii*. *Mol Plant Microbe Interact.* 2014;27(10):1119-31. Epub 2014/09/03. doi:  
654 10.1094/mpmi-01-14-0026-r. PubMed PMID: 25180688.

- 655 38. Franza T, Expert D. Role of iron homeostasis in the virulence of phytopathogenic  
656 bacteria: an 'a la carte' menu. *Molecular plant pathology*. 2013;14(4):429-38. Epub  
657 2012/11/23. doi: 10.1111/mpp.12007. PubMed PMID: 23171271.
- 658 39. Tans-Kersten J, Brown D, Allen C. Swimming motility, a virulence trait of *Ralstonia*  
659 *solanacearum*, is regulated by FlhDC and the plant host environment. *Mol Plant Microbe*  
660 *Interact*. 2004;17(6):686-95. Epub 2004/06/16. doi: 10.1094/mpmi.2004.17.6.686. PubMed  
661 PMID: 15195951.
- 662 40. Jozwick AK, Graf J, Welch TJ. The flagellar master operon *flhDC* is a pleiotropic  
663 regulator involved in motility and virulence of the fish pathogen *Yersinia ruckeri*. *J Appl*  
664 *Microbiol*. 2016. Epub 2016/12/17. doi: 10.1111/jam.13374. PubMed PMID: 27981729.
- 665 41. Xu T, Su Y, Xu Y, He Y, Wang B, Dong X, et al. Mutations of flagellar genes *fliC12*,  
666 *fliA* and *flhDC* of *Edwardsiella tarda* attenuated bacterial motility, biofilm formation and  
667 virulence to fish. *J Appl Microbiol*. 2014;116(2):236-44. Epub 2013/10/15. doi:  
668 10.1111/jam.12357. PubMed PMID: 24118854.
- 669 42. Yuan X, Khokhani D, Wu X, Yang F, Biener G, Koestler BJ, et al. Cross-talk  
670 between a regulatory small RNA, cyclic-di-GMP signalling and flagellar regulator FlhDC for  
671 virulence and bacterial behaviours. *Environ Microbiol*. 2015;17(11):4745-63. Epub  
672 2015/10/16. doi: 10.1111/1462-2920.13029. PubMed PMID: 26462993.
- 673 43. Chatterjee A, Cui Y, Chatterjee AK. RsmC of *Erwinia carotovora* subsp. *carotovora*  
674 negatively controls motility, extracellular protein production, and virulence by binding FlhD  
675 and modulating transcriptional activity of the master regulator, FlhDC. *J Bacteriol*.  
676 2009;191(14):4582-93. Epub 2009/05/19. doi: 10.1128/jb.00154-09. PubMed PMID:  
677 19447906; PubMed Central PMCID: PMC2704716.

- 678 44. Ko M, Park C. H-NS-Dependent regulation of flagellar synthesis is mediated by a  
679 LysR family protein. *J Bacteriol.* 2000;182(16):4670-2. Epub 2000/07/27. PubMed PMID:  
680 10913108; PubMed Central PMCID: PMCPMC94646.
- 681 45. Yi X, Yamazaki A, Biddle E, Zeng Q, Yang CH. Genetic analysis of two  
682 phosphodiesterases reveals cyclic diguanylate regulation of virulence factors in *Dickeya*  
683 *dadantii*. *Mol Microbiol.* 2010;77(3):787-800. Epub 2010/06/30. doi: 10.1111/j.1365-  
684 2958.2010.07246.x. PubMed PMID: 20584146.
- 685 46. Van Gijsegem F, Wlodarczyk A, Cornu A, Reverchon S, Hugouvieux-Cotte-Pattat N.  
686 Analysis of the LacI family regulators of *Erwinia chrysanthemi* 3937, involvement in the  
687 bacterial phytopathogenicity. *Mol Plant Microbe Interact.* 2008;21(11):1471-81. PubMed  
688 PMID: 18842096.
- 689 47. Wolfe AJ. The acetate switch. *Microbiol Mol Biol Rev.* 2005;69(1):12-50. Epub  
690 2005/03/10. doi: 10.1128/membr.69.1.12-50.2005. PubMed PMID: 15755952; PubMed  
691 Central PMCID: PMCPMC1082793.
- 692 48. Antunez-Lamas M, Cabrera-Ordóñez E, Lopez-Solanilla E, Raposo R, Trelles-Salazar  
693 O, Rodríguez-Moreno A, et al. Role of motility and chemotaxis in the pathogenesis of  
694 *Dickeya dadantii* 3937 (ex *Erwinia chrysanthemi* 3937). *Microbiology.* 2009;155(Pt 2):434-  
695 42. Epub 2009/02/10. doi: 10.1099/mic.0.022244-0. PubMed PMID: 19202091.
- 696 49. Rio-Alvarez I, Muñoz-Gómez C, Navas-Vasquez M, Martínez-García PM, Antunez-  
697 Lamas M, Rodríguez-Palenzuela P, et al. Role of *Dickeya dadantii* 3937 chemoreceptors in  
698 the entry to Arabidopsis leaves through wounds. *Molecular plant pathology.* 2015;16(7):685-  
699 98. Epub 2014/12/10. doi: 10.1111/mpp.12227. PubMed PMID: 25487519.
- 700 50. Jahn CE, Willis DK, Charkowski AO. The flagellar sigma factor *fliA* is required for  
701 *Dickeya dadantii* virulence. *Mol Plant Microbe Interact.* 2008;21(11):1431-42. Epub  
702 2008/10/10. doi: 10.1094/mpmi-21-11-1431. PubMed PMID: 18842093.

- 703 51. Taguchi F, Yamamoto M, Ohnishi-Kameyama M, Iwaki M, Yoshida M, Ishii T, et al.  
704 Defects in flagellin glycosylation affect the virulence of *Pseudomonas syringae* pv. *tabaci*  
705 6605. Microbiology. 2010;156(Pt 1):72-80. Epub 2009/10/10. doi: 10.1099/mic.0.030700-0.  
706 PubMed PMID: 19815579.
- 707 52. Khodai-Kalaki M, Andrade A, Fathy Mohamed Y, Valvano MA. *Burkholderia*  
708 *cenocepacia* Lipopolysaccharide Modification and Flagellin Glycosylation Affect Virulence  
709 but Not Innate Immune Recognition in Plants. MBio. 2015;6(3):e00679. Epub 2015/06/06.  
710 doi: 10.1128/mBio.00679-15. PubMed PMID: 26045541; PubMed Central PMCID:  
711 PMC4462625.
- 712 53. Thangavelu B, Bhansali P, Viola RE. Elaboration of a fragment library hit produces  
713 potent and selective aspartate semialdehyde dehydrogenase inhibitors. Bioorg Med Chem.  
714 2015;23(20):6622-31. Epub 2015/09/26. doi: 10.1016/j.bmc.2015.09.017. PubMed PMID:  
715 26404410; PubMed Central PMCID: PMC4601562.
- 716 54. Résibois A, Colet M, Faelen M, Schoonejans E, Toussaint A. phiEC2, a new  
717 generalized transducing phage of *Erwinia chrysanthemi*. Virology. 1984;137(1):102-12.  
718 PubMed PMID: 18639822.
- 719 55. Shevchik VE, Condemine G, Robert-Baudouy J. Characterization of DsbC, a  
720 periplasmic protein of *Erwinia chrysanthemi* and *Escherichia coli* with disulfide isomerase  
721 activity. Embo J. 1994;13(8):2007-12. PubMed PMID: 8168497.
- 722 56. Martin M. Cutadapt removes adapter sequences from high-throughput sequencing  
723 reads. EMBnetjournal. 2011;17:10-2.
- 724 57. Zomer A, Burghout P, Bootsma HJ, Hermans PW, van Hijum SA. ESSENTIALS:  
725 software for rapid analysis of high throughput transposon insertion sequencing data. PLoS  
726 One. 2012;7(8):e43012. Epub 2012/08/18. doi: 10.1371/journal.pone.0043012. PubMed  
727 PMID: 22900082; PubMed Central PMCID: PMC3416827.

- 728 58. Bardonnet N, Blanco C. Improved vectors for transcriptional signal screening in  
729 corynebacteria. FEMS Microbiol Lett. 1991;68(1):97-102. PubMed PMID: 1722768.
- 730 59. Roeder DL, Collmer A. Marker-exchange mutagenesis of a pectate lyase isozyme  
731 gene in *Erwinia chrysanthemi*. J Bacteriol. 1985;164(1):51-6. PubMed PMID: 2995324.
- 732 60. Pandin C, Caroff M, Condemine G. Antimicrobial Peptide Resistance Genes in the  
733 Plant Pathogen *Dickeya dadantii*. Appl Environ Microbiol. 2016;82(21):6423-30. Epub  
734 2016/08/28. doi: 10.1128/aem.01757-16. PubMed PMID: 27565623; PubMed Central  
735 PMCID: PMC5066359.
- 736

**Figure 1**

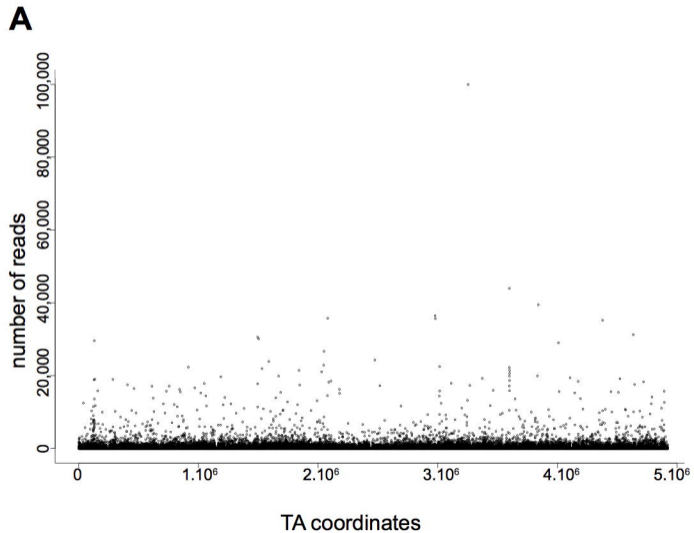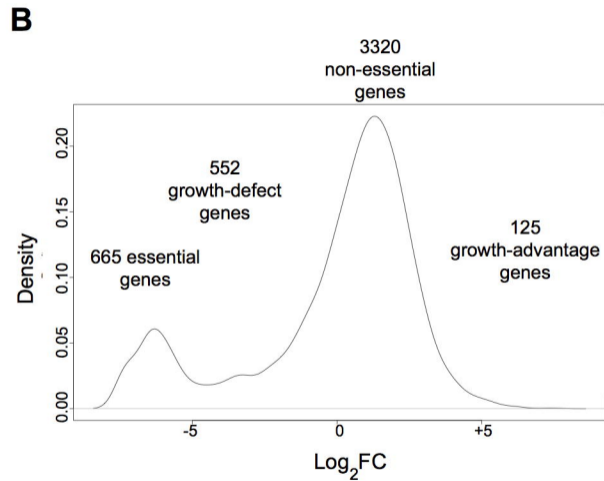



**Figure 2**

| Locus         | Gene               | Function                                                                        | HMM       | RESAMPLING              |                         |           |         |                                  |                      |
|---------------|--------------------|---------------------------------------------------------------------------------|-----------|-------------------------|-------------------------|-----------|---------|----------------------------------|----------------------|
|               |                    |                                                                                 | State     | Mean reads <sup>c</sup> |                         |           |         |                                  |                      |
|               |                    |                                                                                 |           | in LB <sup>a</sup>      | No. of Tas <sup>b</sup> | LB        | Chicory | log <sub>2</sub> FC <sup>d</sup> | q-value <sup>e</sup> |
| Dda3937_00335 | <i>glpD</i>        | glycerol-3-phosphate dehydrogenase                                              | GD        | 33                      | 650                     | 0         |         | -12.56                           | 0.00                 |
| Dda3937_00379 | <i>purL</i>        | phosphoribosylformyl-glycinamide synthetase                                     | NE        | 73                      | 378                     | 0         |         | -11.91                           | 0.00                 |
| Dda3937_03564 | <i>ogpG</i>        | <b>Glucans biosynthesis protein G precursor</b>                                 | <b>GA</b> | <b>40</b>               | <b>1976</b>             | <b>1</b>  |         | <b>-11.41</b>                    | <b>0.00</b>          |
| Dda3937_00244 | <i>purH</i>        | phosphoribosylaminoimidazolecarboxamide formyltransferase/IMP cyclohydrolase    | NE        | 37                      | 145                     | 0         |         | -11.25                           | 0.00                 |
| Dda3937_00432 | <i>hflK</i>        | FtsH protease regulator                                                         | GD        | 28                      | 339                     | 0         |         | -11.12                           | 0.03                 |
| Dda3937_02515 | <i>purM</i>        | phosphoribosylaminoimidazole synthetase                                         | NE        | 21                      | 344                     | 0         |         | -10.57                           | 0.00                 |
| Dda3937_02627 |                    | 4-hydroxythreonine-4-phosphate dehydrogenase                                    | NE        | 26                      | 129                     | 0         |         | -10.06                           | 0.00                 |
| Dda3937_00004 | <i>guaB</i>        | IMP dehydrogenase                                                               | NE        | 33                      | 151                     | 0         |         | -9.97                            | 0.00                 |
| Dda3937_03563 | <i>ogpH</i>        | <b>Glucans biosynthesis glucosyltransferase H</b>                               | <b>GA</b> | <b>62</b>               | <b>1409</b>             | <b>2</b>  |         | <b>-9.79</b>                     | <b>0.00</b>          |
| Dda3937_01284 | <i>pyrB</i>        | aspartate carbamoyltransferase                                                  | NE        | 17                      | 159                     | 0         |         | -9.68                            | 0.00                 |
| Dda3937_03924 | <i>rffG</i>        | <b>dTDP-glucose 4,6-dehydratase</b>                                             | <b>NE</b> | <b>23</b>               | <b>317</b>              | <b>1</b>  |         | <b>-9.38</b>                     | <b>0.02</b>          |
| Dda3937_01389 | <i>carB</i>        | carbamoyl-phosphate synthase large subunit                                      | NE        | 48                      | 249                     | 0         |         | -9.23                            | 0.00                 |
| Dda3937_03299 | <i>acrA</i>        | <b>MexE family multidrug efflux RND transporter periplasmic adaptor subunit</b> | <b>NE</b> | <b>34</b>               | <b>196</b>              | <b>0</b>  |         | <b>-9.03</b>                     | <b>0.00</b>          |
| Dda3937_03300 | <i>acrB</i>        | <b>multidrug efflux system protein</b>                                          | <b>NE</b> | <b>89</b>               | <b>422</b>              | <b>1</b>  |         | <b>-8.90</b>                     | <b>0.00</b>          |
| Dda3937_03258 | <i>pyrE</i>        | orotate phosphoribosyltransferase                                               | NE        | 14                      | 175                     | 0         |         | -8.81                            | 0.00                 |
| Dda3937_02336 | <i>nlp</i>         | lipoprotein                                                                     | GD        | 33                      | 27                      | 0         |         | -8.69                            | 0.00                 |
| Dda3937_02506 | <i>nlpB (bamC)</i> | outer membrane protein assembly factor BamC                                     | NE        | 20                      | 47                      | 0         |         | -8.69                            | 0.00                 |
| Dda3937_04018 | <i>pta</i>         | phosphate acetyltransferase                                                     | GD        | 36                      | 579                     | 2         |         | -8.59                            | 0.02                 |
| Dda3937_03554 | <i>pyrC</i>        | dihydro-orotase                                                                 | NE        | 25                      | 343                     | 1         |         | -8.44                            | 0.00                 |
| Dda3937_04573 | <i>lpxM</i>        | acyl (myristate) transferase                                                    | NE        | 33                      | 63                      | 0         |         | -8.31                            | 0.00                 |
| Dda3937_01116 | <i>glnG</i>        | Nitrogen regulation protein NR(I), Two-component system                         | NE        | 26                      | 39                      | 0         |         | -8.22                            | 0.00                 |
| Dda3937_02099 | <i>purF</i>        | amidophosphoribosyltransferase                                                  | NE        | 32                      | 107                     | 0         |         | -8.19                            | 0.00                 |
| Dda3937_04019 | <i>ackA</i>        | acetate kinase A and propionate kinase 2                                        | NE        | 29                      | 45                      | 0         |         | -8.16                            | 0.00                 |
| Dda3937_02189 | <i>yejM</i>        | Membrane-anchored periplasmic protein, alkaline phosphatase superfamily         | GA        | 34                      | 4160                    | 15        |         | -8.08                            | 0.00                 |
| Dda3937_01390 | <i>carA</i>        | carbamoyl-phosphate synthase small subunit                                      | NE        | 21                      | 69                      | 0         |         | -8.05                            | 0.00                 |
| Dda3937_01426 | <i>ptsI</i>        | Phosphoenolpyruvate-protein phosphotransferase of PTS system                    | NE        | 33                      | 45                      | 0         |         | -7.85                            | 0.00                 |
| Dda3937_00161 | <i>cysQ</i>        | 3(2),5'-bisphosphate nucleotidase                                               | NE        | 16                      | 44                      | 0         |         | -7.81                            | 0.02                 |
| Dda3937_00210 | <i>cysI</i>        | sulfite reductase beta subunit                                                  | NE        | 40                      | 252                     | 1         |         | -7.65                            | 0.00                 |
| Dda3937_04075 | <i>lysR</i>        | LysR family transcriptional regulator                                           | NE        | 33                      | 2385                    | 13        |         | -7.51                            | 0.00                 |
| Dda3937_02526 |                    | conserved protein                                                               | NE        | 18                      | 50                      | 0         |         | -7.50                            | 0.00                 |
| Dda3937_03888 | <i>metB</i>        | Cystathionine gamma-synthase                                                    | NE        | 21                      | 118                     | 1         |         | -7.34                            | 0.01                 |
| Dda3937_01915 | <i>relA</i>        | (pppGpp) synthetase I/GTP pyrophosphokinase                                     | NE        | 55                      | 256                     | 2         |         | -7.12                            | 0.00                 |
| Dda3937_02532 | <i>lfcR</i>        | <b>Fructose repressor FRUR, LacI family</b>                                     | <b>NE</b> | <b>15</b>               | <b>399</b>              | <b>3</b>  |         | <b>-7.04</b>                     | <b>0.00</b>          |
| Dda3937_02226 | <i>flfF</i>        | Flagellar M-ring protein flfF                                                   | NE        | 46                      | 476                     | 4         |         | -7.02                            | 0.04                 |
| Dda3937_02206 | <i>flgE</i>        | Flagellar hook protein flgE                                                     | NE        | 50                      | 597                     | 5         |         | -7.00                            | 0.00                 |
| Dda3937_04507 | <i>gnd</i>         | phosphogluconate dehydrogenase (NADP(+)-dependent, decarboxylating)             | GD        | 36                      | 7                       | 0         |         | -6.91                            | 0.00                 |
| Dda3937_00697 | <i>degQ</i>        | Protease                                                                        | NE        | 28                      | 80                      | 1         |         | -6.87                            | 0.01                 |
| Dda3937_03631 | <i>trxB</i>        | thioredoxin-disulfide reductase                                                 | GD        | 25                      | 16                      | 0         |         | -6.85                            | 0.03                 |
| Dda3937_00361 | <i>yyjF (igaA)</i> | intracellular growth attenuator protein                                         | GD        | 38                      | 22                      | 0         |         | -6.78                            | 0.03                 |
| Dda3937_00588 | <i>cysB</i>        | Transcriptional dual regulator, O-acetyl-L-serine-binding protein               | NE        | 29                      | 90                      | 1         |         | -6.75                            | 0.00                 |
| Dda3937_03783 | <i>prc</i>         | carboxy-terminal protease for penicillin-binding protein 3                      | NE        | 46                      | 243                     | 2         |         | -6.71                            | 0.00                 |
| Dda3937_00433 | <i>hflX</i>        | predicted GTPase                                                                | GD        | 27                      | 16                      | 0         |         | -6.69                            | 0.04                 |
| Dda3937_03427 | <i>flfC</i>        | flagellar filament structural protein (flagellin)                               | NE        | 33                      | 96                      | 1         |         | -6.61                            | 0.03                 |
| Dda3937_02223 | <i>flfI</i>        | Flagellum-specific ATP synthase flfI                                            | NE        | 42                      | 236                     | 3         |         | -6.56                            | 0.00                 |
| Dda3937_04419 | <i>hdjR</i>        | DNA-binding transcriptional regulator                                           | NE        | 29                      | 117                     | 1         |         | -6.34                            | 0.00                 |
| Dda3937_00209 | <i>cysJ</i>        | sulfite reductase alpha subunit                                                 | NE        | 41                      | 180                     | 2         |         | -6.25                            | 0.00                 |
| Dda3937_02209 | <i>flgH</i>        | Flagellar L-ring protein flgH                                                   | NE        | 23                      | 586                     | 8         |         | -6.22                            | 0.01                 |
| Dda3937_02246 | <i>fabF</i>        | beta-ketoacyl-[acyl-carrier-protein] synthase II                                | GD        | 41                      | 10                      | 0         |         | -6.15                            | 0.00                 |
| Dda3937_00301 | <i>uvrD</i>        | ATP-dependent DNA helicase UvrD/PcrA                                            | NE        | 42                      | 219                     | 0         |         | -6.11                            | 0.00                 |
| Dda3937_02212 | <i>flgK</i>        | Flagellar hook-associated protein flgK                                          | NE        | 63                      | 116                     | 2         |         | -6.07                            | 0.00                 |
| Dda3937_04046 | <i>purU</i>        | Formyltetrahydrofolate deformylase                                              | NE        | 28                      | 51                      | 1         |         | -5.84                            | 0.00                 |
| Dda3937_03965 | <i>flhA</i>        | predicted flagellar export pore protein                                         | NE        | 49                      | 106                     | 2         |         | -5.80                            | 0.00                 |
| Dda3937_02205 | <i>flgD</i>        | Flagellar basal-body rod modification protein flgD                              | NE        | 22                      | 227                     | 4         |         | -5.73                            | 0.01                 |
| Dda3937_01352 | <i>lucC</i>        | 3-isopropylmalate dehydratase large subunit                                     | NE        | 21                      | 139                     | 3         |         | -5.73                            | 0.01                 |
| Dda3937_02784 | <i>flhC</i>        | Flagellar transcriptional activator flhC                                        | NE        | 20                      | 477                     | 9         |         | -5.66                            | 0.01                 |
| Dda3937_02782 | <i>motB</i>        | Flagellar motor rotation protein motB                                           | NE        | 40                      | 109                     | 2         |         | -5.55                            | 0.01                 |
| Dda3937_02210 | <i>flgI</i>        | Flagellar P-ring protein flgI                                                   | NE        | 26                      | 163                     | 4         |         | -5.49                            | 0.00                 |
| Dda3937_02222 | <i>flfJ</i>        | Flagellar protein flfJ                                                          | NE        | 14                      | 182                     | 4         |         | -5.44                            | 0.03                 |
| Dda3937_02219 | <i>flfM</i>        | Flagellar motor switch protein flfM                                             | NE        | 27                      | 143                     | 3         |         | -5.40                            | 0.00                 |
| Dda3937_02774 | <i>flhB</i>        | Flagellar biosynthesis protein flhB                                             | NE        | 32                      | 186                     | 5         |         | -5.31                            | 0.00                 |
| Dda3937_02777 | <i>cheB</i>        | Chemotaxis response regulator protein-glutamate methyltransferase CheB          | NE        | 31                      | 282                     | 8         |         | -5.14                            | 0.00                 |
| Dda3937_02783 | <i>motA</i>        | Flagellar motor rotation protein motA                                           | NE        | 24                      | 39                      | 1         |         | -5.06                            | 0.00                 |
| Dda3937_00565 | <b>tonB</b>        | <b>TonB protein</b>                                                             | <b>NE</b> | <b>14</b>               | <b>106</b>              | <b>3</b>  |         | <b>-5.00</b>                     | <b>0.05</b>          |
| Dda3937_00427 | <i>fbp</i>         | fructose-bisphosphatase                                                         | GA        | 33                      | 805                     | 27        |         | -4.92                            | 0.01                 |
| Dda3937_02781 | <i>cheA</i>        | Chemotaxis protein CheA                                                         | NE        | 50                      | 151                     | 5         |         | -4.89                            | 0.00                 |
| Dda3937_03422 |                    | Carbamoyl-phosphate synthase small subunit                                      | NE        | 43                      | 379                     | 13        |         | -4.85                            | 0.02                 |
| Dda3937_02577 | <i>lysA</i>        | diaminopimelate decarboxylase                                                   | NE        | 23                      | 332                     | 0         |         | -4.79                            | 0.00                 |
| Dda3937_02207 | <i>flgF</i>        | Flagellar basal-body rod protein flgF                                           | NE        | 21                      | 35                      | 1         |         | -4.76                            | 0.00                 |
| Dda3937_02230 | <i>flfD</i>        | Flagellar hook-associated protein flfD                                          | NE        | 47                      | 93                      | 3         |         | -4.75                            | 0.00                 |
| Dda3937_04301 | <i>leuA</i>        | 2-isopropylmalate synthase                                                      | NE        | 36                      | 35                      | 1         |         | -4.69                            | 0.02                 |
| Dda3937_02778 | <i>cheR</i>        | Chemotaxis protein methyltransferase CheR                                       | NE        | 30                      | 462                     | 18        |         | -4.67                            | 0.05                 |
| Dda3937_02228 | <i>flfT</i>        | Flagellar biosynthesis protein flfT                                             | GD        | 16                      | 8                       | 0         |         | -4.63                            | 0.05                 |
| Dda3937_04404 | <i>leuB</i>        | 3-isopropylmalate dehydrogenase                                                 | NE        | 16                      | 285                     | 12        |         | -4.63                            | 0.05                 |
| Dda3937_02214 | <i>flfR</i>        | Flagellar biosynthesis protein flfR                                             | NE        | 33                      | 268                     | 11        |         | -4.56                            | 0.00                 |
| Dda3937_03727 | <b>kdsI</b>        | <b>4-deoxy-L-threo-5-hexosulose-uronate ketol-isomerase</b>                     | <b>NE</b> | <b>26</b>               | <b>708</b>              | <b>3</b>  |         | <b>-4.54</b>                     | <b>0.03</b>          |
| Dda3937_03267 |                    | O-antigen, teichoic acid lipoteichoic acids export membrane protein             | ES        | 107                     | 89                      | 4         |         | -4.33                            | 0.05                 |
| Dda3937_00415 | <i>epd</i>         | D-erythrose 4-phosphate dehydrogenase                                           | NE        | 26                      | 316                     | 16        |         | -4.27                            | 0.02                 |
| Dda3937_02337 | <i>ppv</i>         | polynucleotide phosphorylase/polyadenylase                                      | GD        | 50                      | 5                       | 0         |         | -3.97                            | 0.00                 |
| Dda3937_01683 | <i>purK</i>        | N5-carboxyaminoimidazole ribonucleotide synthase                                | NE        | 16                      | 90                      | 0         |         | -3.49                            | 0.01                 |
| Dda3937_00689 | <i>yyhF (mlaF)</i> | predicted toluene transporter subunit                                           | GA        | 9                       | 1254                    | 114       |         | -3.47                            | 0.01                 |
| Dda3937_02829 | <i>helD</i>        | DNA helicase IV                                                                 | NE        | 26                      | 99                      | 9         |         | -3.46                            | 0.01                 |
| Dda3937_02252 | <i>ptgG</i>        | PTS system glucose-specific IICB component                                      | NE        | 37                      | 81                      | 8         |         | -3.38                            | 0.03                 |
| Dda3937_00726 | <b>taoC</b>        | <b>transport channel</b>                                                        | <b>NE</b> | <b>34</b>               | <b>184</b>              | <b>0</b>  |         | <b>-3.35</b>                     | <b>0.00</b>          |
| Dda3937_02363 | <i>clpA</i>        | ATP-dependent Clp protease ATP-binding subunit                                  | NE        | 44                      | 64                      | 8         |         | -3.02                            | 0.03                 |
| Dda3937_02470 | <i>corC</i>        | magnesium and cobalt ions transport                                             | NE        | 13                      | 159                     | 21        |         | -2.90                            | 0.02                 |
| Dda3937_00692 | <i>yyhC (mlaC)</i> | predicted ABC-type organic solvent transporter                                  | GA        | 23                      | 740                     | 106       |         | -2.81                            | 0.01                 |
| Dda3937_02045 | <i>envC</i>        | murinein hlydase activator                                                      | NE        | 17                      | 71                      | 12        |         | -2.59                            | 0.00                 |
| Dda3937_01807 | <i>nuoM</i>        | NADH-quinone oxidoreductase subunit M                                           | NE        | 29                      | 57                      | 10        |         | -2.47                            | 0.03                 |
| Dda3937_03668 | <i>sufB</i>        | Fe-S cluster assembly protein                                                   | NE        | 32                      | 116                     | 21        |         | -2.44                            | 0.00                 |
| Dda3937_02080 | <i>trkG</i>        | Potassium uptake protein                                                        | NE        | 36                      | 65                      | 13        |         | -2.23                            | 0.05                 |
| Dda3937_03042 | <b>fet</b>         | <b>ferriichrysoactin outer membrane receptor</b>                                | <b>NE</b> | <b>80</b>               | <b>244</b>              | <b>51</b> |         | <b>-2.25</b>                     | <b>0.01</b>          |
| Dda3937_01287 | <i>argI</i>        | Ornithine carbamoyltransferase                                                  | NE        | 24                      | 279                     | 59        |         | -2.23                            | 0.03                 |
| Dda3937_02456 | <i>rsmC</i>        | global regulatory protein RsmC                                                  | NE        | 10                      | 116                     | 221,705   | 10,900  | 10.90                            | 0.028                |
| Dda3937_03858 | <i>gcpA</i>        | hypothetical protein                                                            | GA        | 55                      | 3728                    | 140,136   | 5,230   | 5.23                             | 0.00                 |
| Dda3937_03971 | <i>mltD</i>        | outer membrane-bound lytic murein transglycosylase D                            | NE        | 46                      | 276                     | 10,885    | 5.30    | 0.00                             |                      |
| Dda3937_00363 | <i>mrcA</i>        | penicillin-binding protein 1A (PBP1A)                                           | NE        | 53                      | 85                      | 468       | 2.47    | 0.021                            |                      |

**Figure 3**

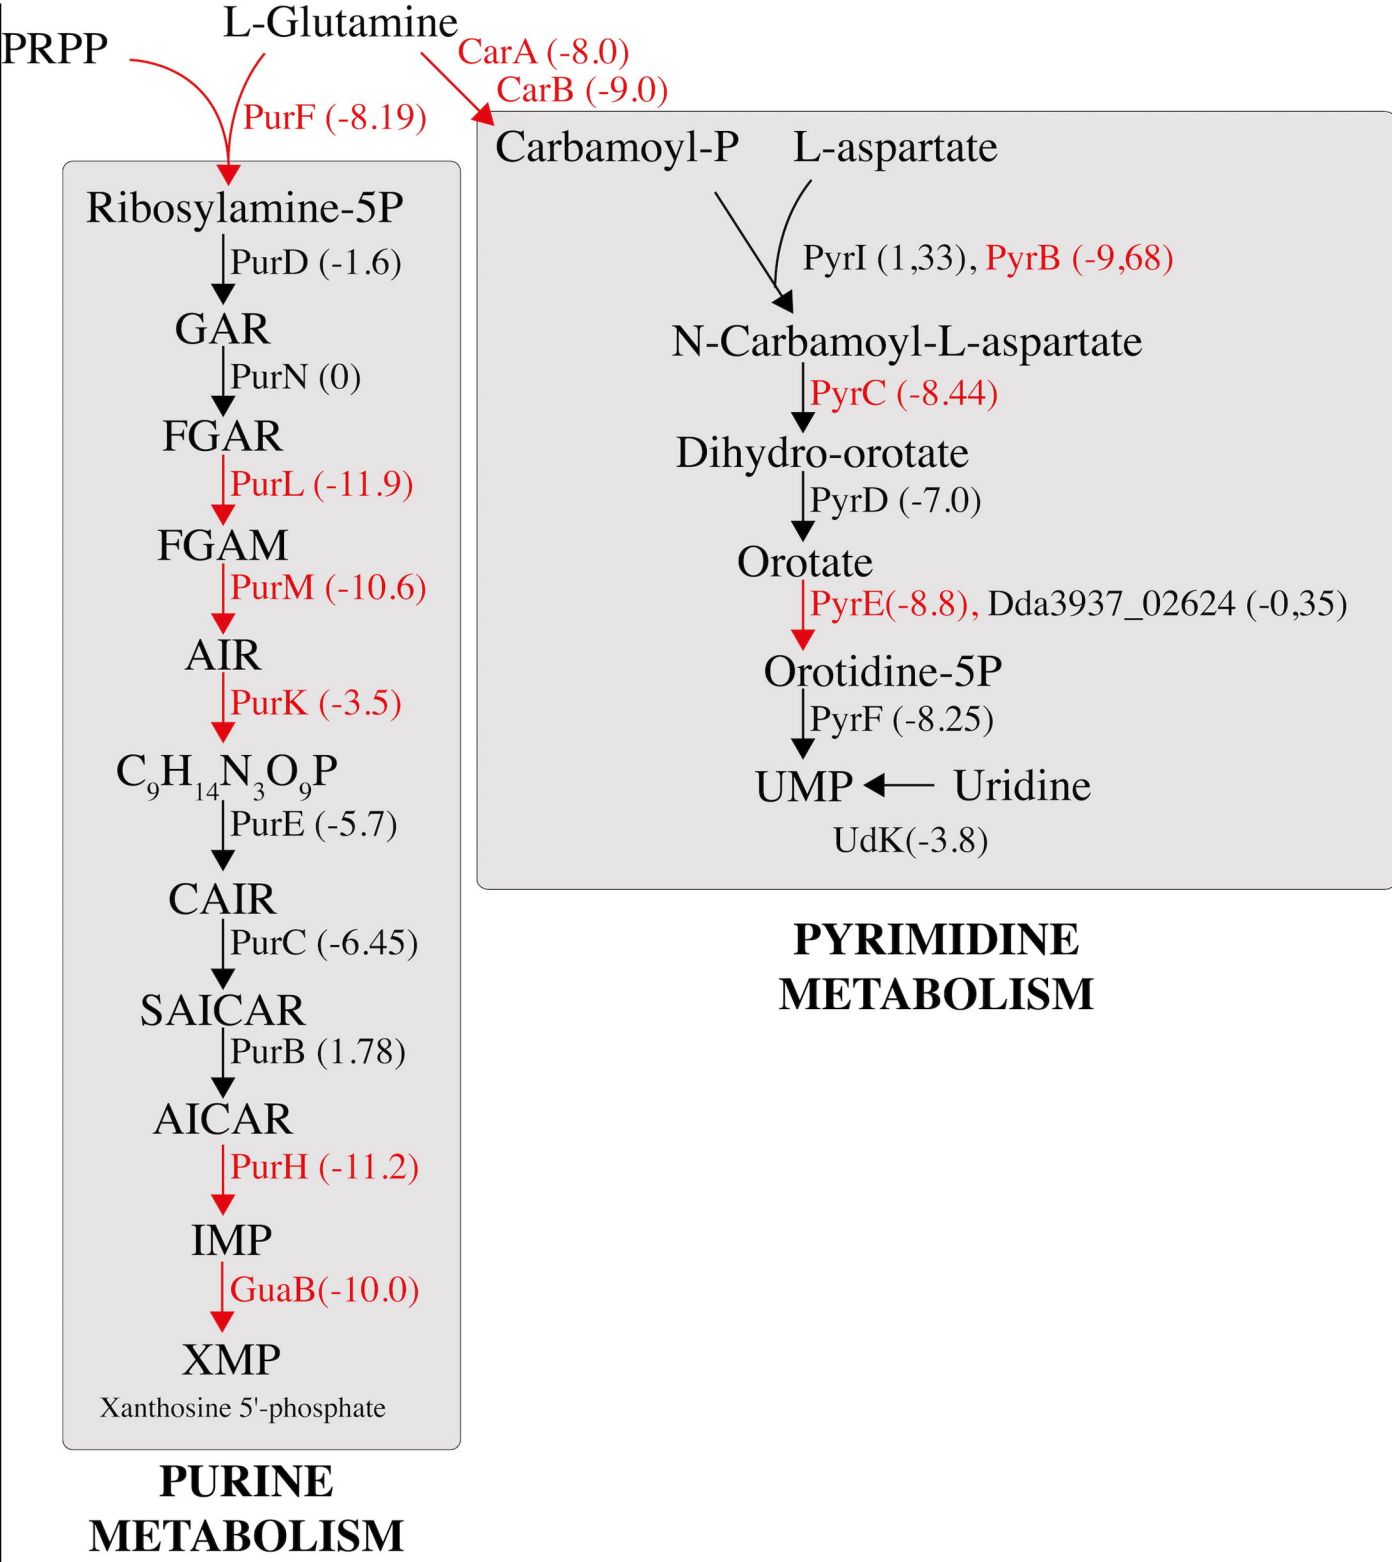

# Figure 4

A

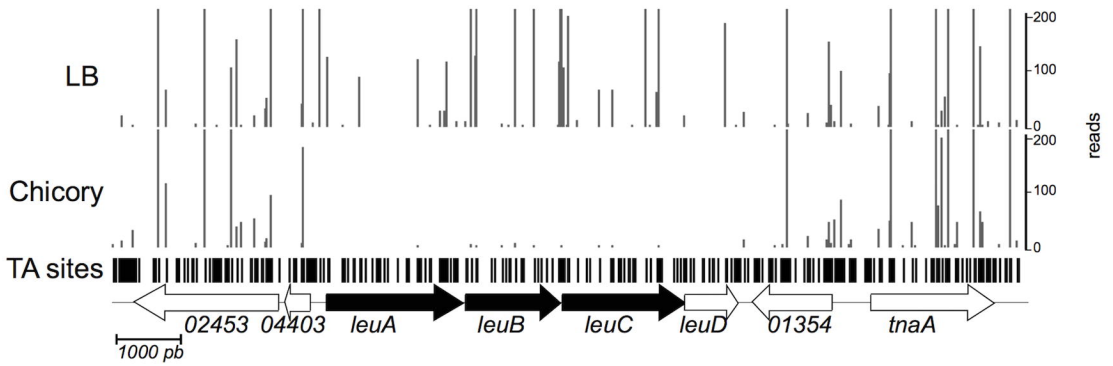

B

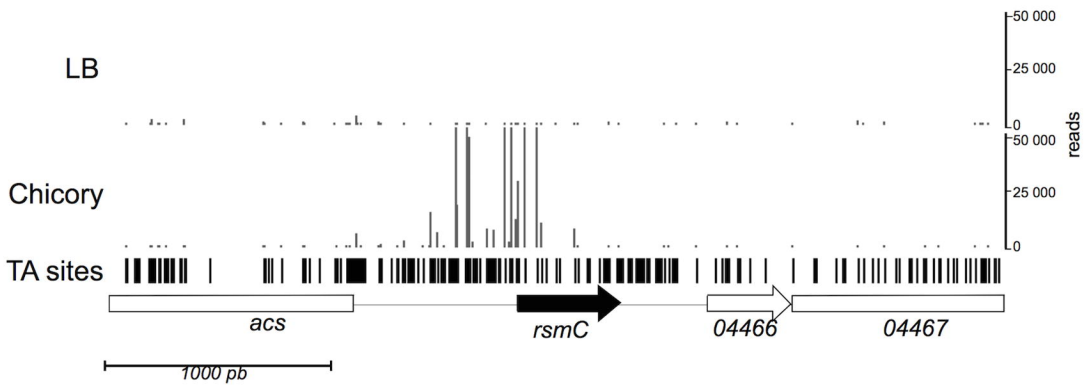

C

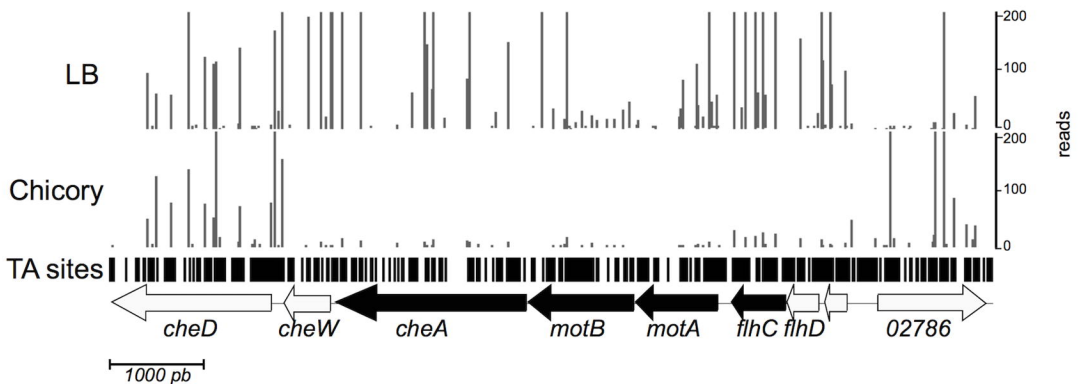

# Figure 5

## A

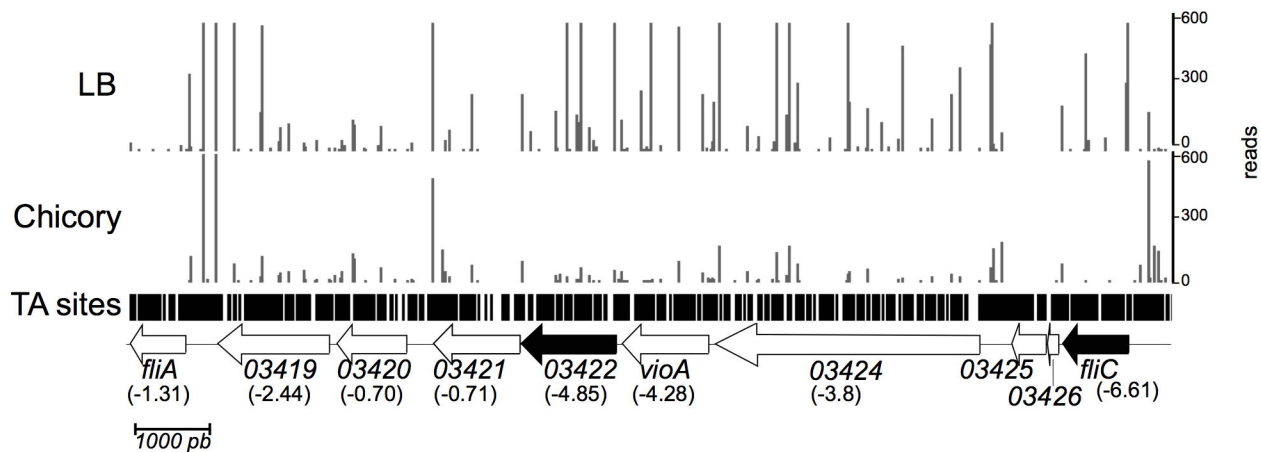

## B

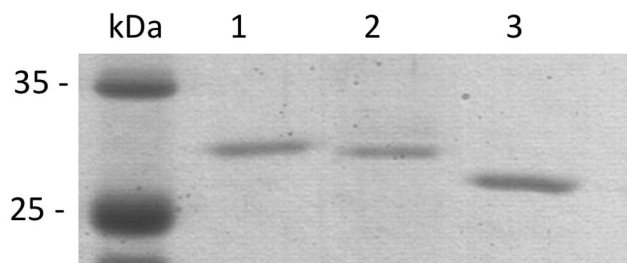

# Figure 6

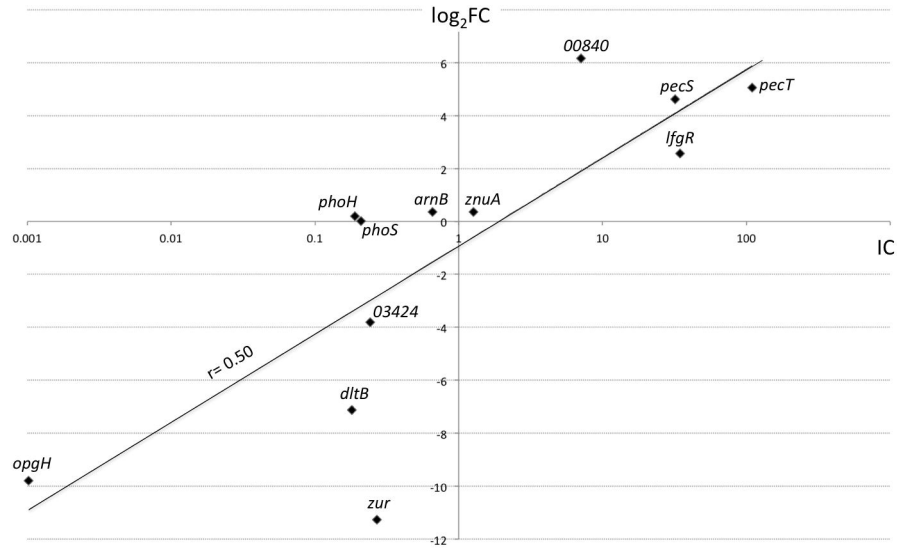

Source: http://www.biorxiv.org/content/10.1101/126896v1.full.pdf
